# Supplementary material for: Genetic analysis of production, physiological, and egg quality traits in heat-challenged commercial white egg-laying hens using 600k SNP array data
Source: PubMed Central journal article supplement (PMC6593552; doi:10.1186/s12711-019-0474-6), 2019-06-25
Supplement: 12711_2019_474_MOESM1_ESM.pdf [file 12711_2019_474_MOESM1_ESM.pdf]

**Table S1: Trait, position, and p-value information for SNPs reaching the 20% genomewide threshold**

| Trait                          | SNP         | Position <sup>1</sup> | P-value  |
|--------------------------------|-------------|-----------------------|----------|
| Albumen weight<br>1 weeks heat | AX-76293016 | 23:5018426            | 5.52e-06 |
| Haugh units<br>pre heat        | AX-76783301 | 5:16033595            | 1.24e-05 |
| Haugh units<br>1 week heat     | AX-76166420 | 2:84131913            | 3.61E-06 |
|                                | AX-76166253 | un-localized          | 4.46E-06 |
|                                | AX-76166444 | 2:84148089            | 6.56E-06 |
|                                | AX-76166769 | 2:84340486            | 7.06E-06 |
|                                | AX-76166961 | 2:84446006            | 7.06E-06 |
|                                | AX-76166265 | 2:84047829            | 7.16E-06 |
|                                | AX-76166318 | 2:84078395            | 7.16E-06 |
|                                | AX-76166455 | 2:84154322            | 7.16E-06 |
|                                | AX-76166456 | 2:84155374            | 7.16E-06 |
|                                | AX-76166478 | 2:84172587            | 7.16E-06 |
|                                | AX-76166486 | 2:84176689            | 7.16E-06 |
|                                | AX-80982716 | 2:84177913            | 7.16E-06 |
|                                | AX-76166493 | 2:84179014            | 7.16E-06 |
|                                | AX-80889176 | 2:84305979            | 7.16E-06 |
|                                | AX-76166756 | 2:84332508            | 7.16E-06 |
|                                | AX-76166767 | 2:84337632            | 7.16E-06 |
|                                | AX-76166914 | 2:84423955            | 7.16E-06 |
|                                | AX-76166950 | 2:84439068            | 7.16E-06 |
|                                | AX-76166970 | 2:84455353            | 7.16E-06 |
|                                | AX-76167005 | 2:84475576            | 7.16E-06 |
|                                | AX-76166982 | 2:84459017            | 7.34E-06 |
|                                | AX-76166962 | 2:84448699            | 8.47E-06 |
|                                | AX-76168012 | 2:84983895            | 8.71E-06 |
|                                | AX-76166466 | 2:84165069            | 8.77E-06 |
|                                | AX-76167039 | 2:84493970            | 1.01E-05 |
|                                | AX-80769204 | 2:84541027            | 1.06E-05 |
|                                | AX-76166415 | 2:84129666            | 1.08E-05 |
|                                | AX-76167231 | 2:84597667            | 1.08E-05 |
|                                | AX-76168148 | 2:85056902            | 1.11E-05 |
|                                | AX-76167339 | 2:84652180            | 1.21E-05 |
|                                | AX-76166661 | 2:84275064            | 1.23E-05 |
| Haugh units<br>2 weeks heat    | AX-76166914 | 2:84423955            | 1.57E-06 |
|                                | AX-76166253 | un-localized          | 1.96E-06 |
|                                | AX-76166420 | 2:84131913            | 2.23E-06 |
|                                | AX-76166756 | 2:84332508            | 2.60E-06 |
|                                | AX-76166318 | 2:84078395            | 2.84E-06 |
|                                | AX-76166444 | 2:84148089            | 2.86E-06 |
|                                | AX-76166961 | 2:84446006            | 2.87E-06 |
|                                | AX-76166769 | 2:84340486            | 2.87E-06 |
|                                | AX-76166265 | 2:84047829            | 2.96E-06 |
|                                | AX-76166455 | 2:84154322            | 2.96E-06 |
|                                | AX-76166456 | 2:84155374            | 2.96E-06 |
|                                | AX-76166478 | 2:84172587            | 2.96E-06 |
|                                | AX-76166486 | 2:84176689            | 2.96E-06 |
|                                | AX-80982716 | 2:84177913            | 2.96E-06 |
|                                | AX-76166493 | 2:84179014            | 2.96E-06 |
|                                | AX-80889176 | 2:84305979            | 2.96E-06 |
|                                | AX-76166767 | 2:84337632            | 2.96E-06 |
|                                | AX-76166950 | 2:84439068            | 2.96E-06 |
|                                | AX-76166962 | 2:84448699            | 2.96E-06 |
|                                | AX-76166970 | 2:84455353            | 2.96E-06 |
|                                | AX-76167005 | 2:84475576            | 2.96E-06 |

|                    |             |            |          |
|--------------------|-------------|------------|----------|
|                    | AX-76166466 | 2:84165069 | 3.01E-06 |
|                    | AX-76166982 | 2:84459017 | 3.29E-06 |
|                    | AX-76168242 | 2:85107801 | 4.04E-06 |
|                    | AX-76168148 | 2:85056902 | 4.38E-06 |
|                    | AX-76168104 | 2:85031666 | 5.70E-06 |
|                    | AX-76168218 | 2:85093024 | 7.49E-06 |
|                    | AX-76168091 | 2:85024396 | 8.19E-06 |
|                    | AX-76167039 | 2:84493970 | 8.28E-06 |
|                    | AX-80934531 | 2:84992922 | 8.44E-06 |
|                    | AX-76168012 | 2:84983895 | 8.89E-06 |
|                    | AX-76166776 | 2:84343131 | 8.94E-06 |
| Haugh Units        | AX-76782683 | 5:15753420 | 1.71E-06 |
| 4 weeks heat       | AX-76782685 | 5:15754520 | 1.71E-06 |
|                    | AX-76782618 | 5:15725858 | 4.55E-06 |
|                    | AX-76783267 | 5:16016857 | 4.73E-06 |
|                    | AX-76782558 | 5:15699551 | 5.60E-06 |
|                    | AX-76782576 | 5:15707824 | 5.60E-06 |
|                    | AX-76783465 | 5:16148429 | 7.63E-06 |
|                    | AX-76782582 | 5:15710821 | 8.18E-06 |
|                    | AX-77282055 | 5:16119286 | 8.49E-06 |
|                    | AX-76783403 | 5:16123222 | 8.49E-06 |
|                    | AX-76783471 | 5:16151589 | 1.14E-05 |
|                    | AX-77282057 | 5:16147197 | 1.19E-05 |
|                    | AX-76783430 | 5:16133443 | 1.23E-05 |
|                    | AX-76783141 | 5:15959219 | 1.23E-05 |
| Body weight        | AX-75913908 | 18:8951897 | 5.15e-06 |
| 2 weeks heat       | AX-75913927 | 18:8956053 | 1.09e-05 |
| Body weight        | AX-75896940 | 18:4086805 | 4.93e-06 |
| 3 weeks heat       |             |            |          |
| Body weight        | AX-75896940 | 18:4086805 | 4.82e-07 |
| 4 weeks heat       | AX-80956355 | 18:4078862 | 6.64e-06 |
|                    | AX-76508489 | 3:57039982 | 1.12e-05 |
| Egg mass           | AX-76764925 | 33:129913  | 1.52e-06 |
| 2 weeks heat       | AX-76764951 | 33:135041  | 1.89e-06 |
| Change in Egg mass | AX-76046616 | 2:16822397 | 8.81E-06 |
| pre heat to week 4 | AX-76045969 | 2:16459295 | 1.06E-05 |
|                    | AX-76045989 | 2:16472662 | 1.07E-05 |
|                    | AX-76046175 | 2:16585934 | 1.08E-05 |
|                    | AX-76045950 | 2:16449632 | 1.13E-05 |
|                    | AX-76046027 | 2:16500045 | 1.13E-05 |
|                    | AX-76046171 | 2:16583520 | 1.13E-05 |
|                    | AX-76046214 | 2:16605780 | 1.13E-05 |
|                    | AX-76045968 | 2:16458999 | 1.13E-05 |
|                    | AX-76045978 | 2:16467046 | 1.13E-05 |
|                    | AX-76045990 | 2:16473553 | 1.13E-05 |
|                    | AX-76046117 | 2:16552057 | 1.13E-05 |
|                    | AX-76046219 | 2:16607679 | 1.13E-05 |
|                    | AX-76046025 | 2:16497711 | 1.13E-05 |
|                    | AX-76046010 | 2:16488326 | 1.18E-05 |

<sup>1</sup>Chromosome:base pair

<sup>2</sup>Location of SNP relative to neighboring genes (base pairs)
